# Supplementary material
Source: publisher figshare collection journal article supplement (https://acs.figshare.com/ndownloader/files/28358554)
Supplement: Supplementary file 1 [file 28358554]

**Supporting information**

**The Optimized TrkB Agonist Ameliorates Alzheimer's Disease Pathologies and  
Improves Cognitive Functions via Inhibiting Delta-secretase**

By

Chun Chen<sup>1</sup>, Eun Hee Ahn<sup>1</sup>, Xia Liu<sup>1</sup>, Zhi-Hao Wang<sup>1</sup>, Shilin Luo<sup>1</sup>, Jianming Liao<sup>1,2</sup>  
and Keqiang Ye<sup>1,\*</sup>

<sup>1</sup>Department of Pathology and Laboratory Medicine

Emory University School of Medicine

Atlanta, GA 30322, USA

<sup>2</sup>Department of Neurosurgery, Renmin Hospital,

Wuhan University,

Wuhan, Hubei Province 430060, China

\*To whom all correspondence should be addressed (E-mail: kye@emory.edu)

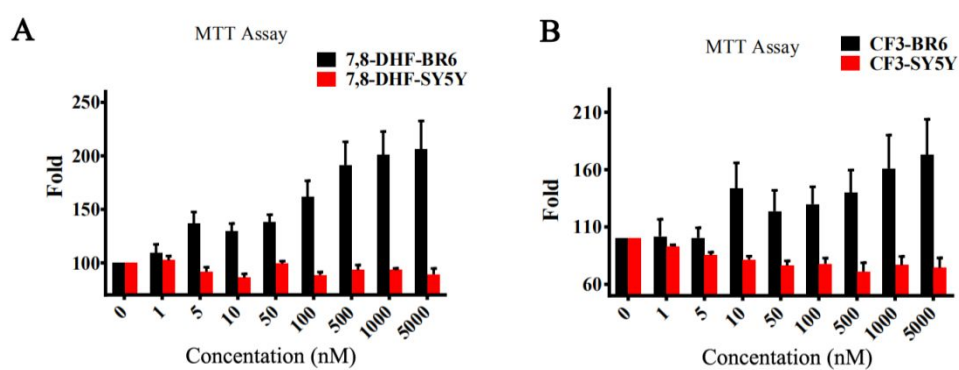

**Supplementary Figure 1. CF3CN selectively protects human TrkB stably transfected BR6 cells but not SH-SY5Y cells**

A & B. MTT assay. 7,8-DHF and CF3CN selectively protect BR6 but not SH-SY5Y cells in a TrkB-dependent manner.

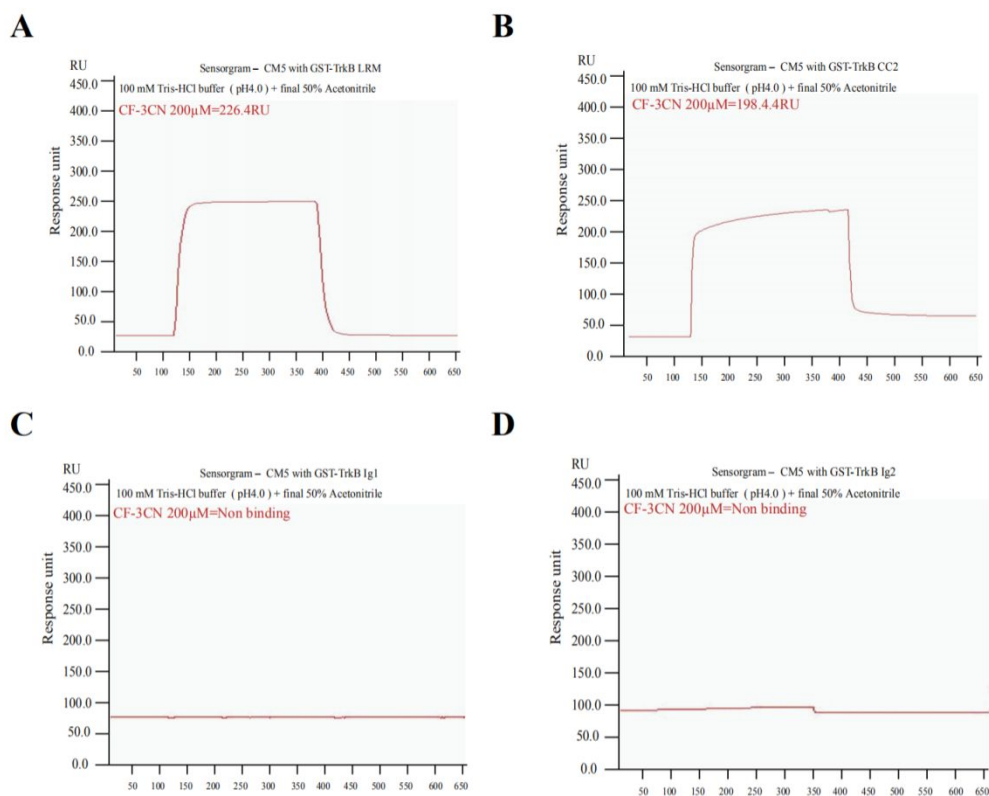

**Supplementary Figure 2. CF3CN selectively binds to TrkB LRM and CC2**

**domains.**

A-D, Biacore analysis of the interaction between CF3CN and various purified TrkB ECD motif recombinant proteins.

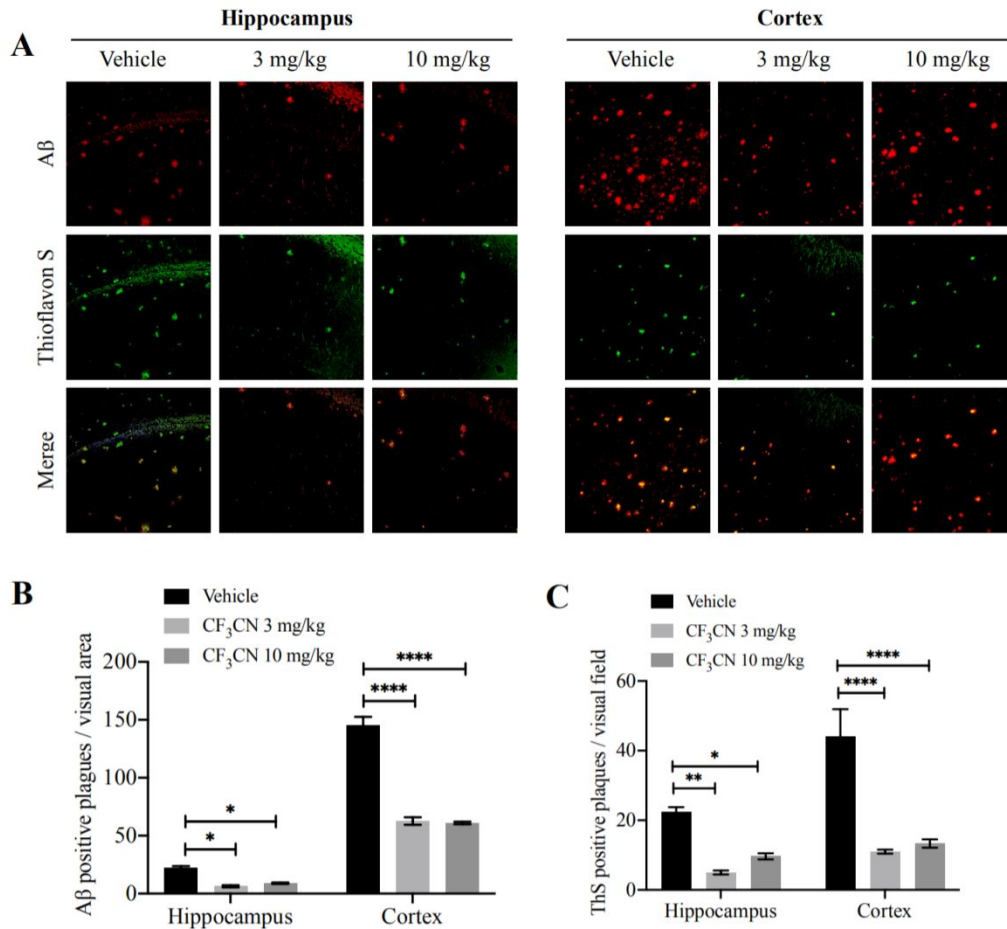

**Supplementary Figure 3. CF<sub>3</sub>CN decreases A $\beta$  plaque deposition in 5xFAD mice.**

A, Immunofluorescence and Thioflavin-S co-staining of amyloid plaque in the hippocampus and cortex of 5xFAD mice brain sections. Scale bar, 100  $\mu$ m.

B & C, Quantitative analysis of amyloid plaques. Amyloid deposition in 5xFAD mice was significantly decreased by orally administrated CF<sub>3</sub>CN. (n=5 per group, Data are shown as mean  $\pm$  SEM. \* $p$  < 0.05, \*\* $p$  < 0.01, \*\*\*\* $p$  < 0.0001, two-way ANOVA)



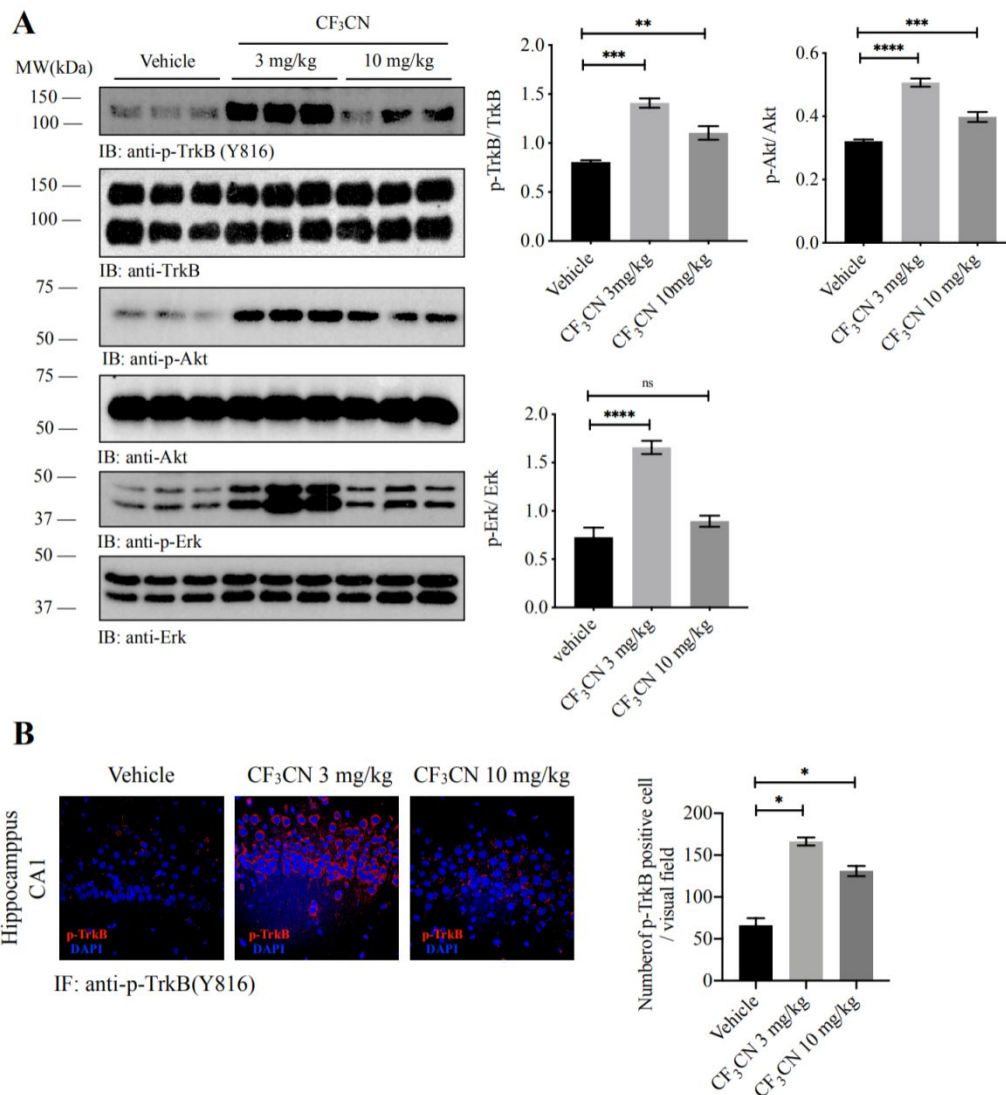

**Supplementary Figure 4. CF<sub>3</sub>CN elicits TrkB and downstream signaling activation in 5xFAD mice.**

A, CF<sub>3</sub>CN activate TrkB signaling cascade in the hippocampus of 5xFAD mice. CF<sub>3</sub>CN were dissolved in pure DMSO, then suspended in 0.5% methylcellulose at final concentration of 5% DMSO/0.5% methylcellulose. The suspension was orally administrated to 3 months old 5xFAD mice (3mg/kg/d and 10mg/kg/d) consecutively

for 3 months, and the brain lysates were prepared. The p-TrkB and its downstream signals were monitored by immunoblotting, and the ratio of p-TrkB/TrkB, p-Akt/Akt and p-ERK/ERK were quantitatively analyzed. (n=3 per group, Data are shown as mean  $\pm$  SEM. \*\*  $p < 0.01$ , \*\*\*  $p < 0.001$ , \*\*\*\*  $p < 0.0001$ , one-way ANOVA).

B, Immunofluorescence staining of p-TrkB in 5xFAD brain sections. Three-months old 5xFAD mice were fed with CF3CN or vehicle consecutively for 3 months. The phosphorylation of TrkB in dentate gyrus was detected by immunofluorescence with anti-p-TrkB 816 antibodies. Scale bar, 50  $\mu$ m. Quantification of p-TrkB positive neurons in the dentate gyrus. Note that CF3CN treatment elicited the phosphorylation of TrkB in 5xFAD mice. (n=5 per group, Data are shown as mean  $\pm$  SEM. \*  $p < 0.05$ ).

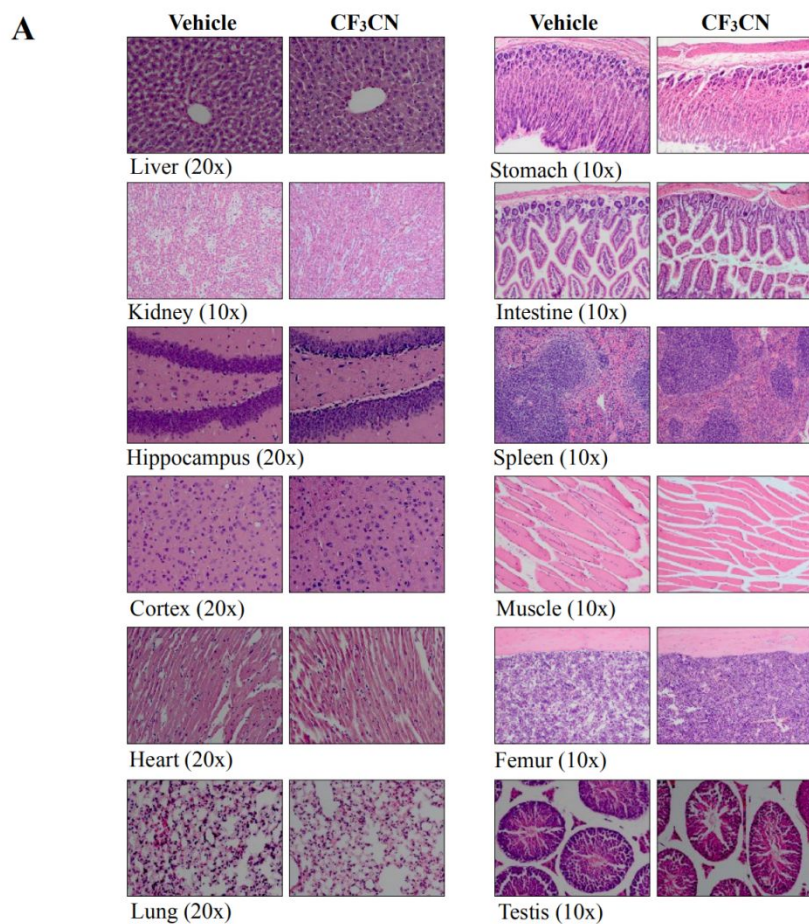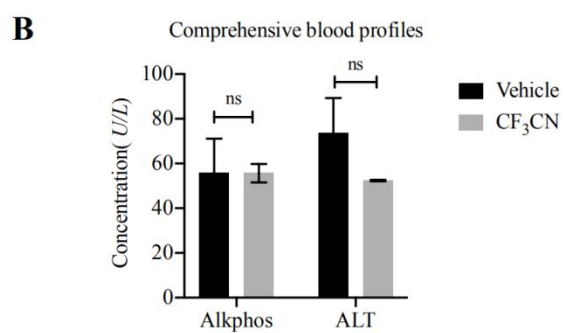

**Supplementary Figure 5. 12 weeks treatment with CF<sub>3</sub>CN demonstrates no toxic effect on tissue and blood.**



## Supplementary Tables

Table S1: Plasma Stability: Half-Life Data Summary

| Compound      | Species | Half Life (mins) | MRM Transition    | Avg % Remaining at Last Point* | Comments |
|---------------|---------|------------------|-------------------|--------------------------------|----------|
| CF3CN         | Human   | > 480            | 356.01 > 153.891  | 94.2                           |          |
| Propantheline | Human   | 23.9             | 369.315 > 182.078 | 3.15                           | Control  |
| Warfarin      | Human   | > 480            | 309.149 > 163.011 | 93.6                           | Control  |
| CF3CN         | Mouse   | > 480            | 356.01 > 153.891  | 107                            |          |
| Propantheline | Mouse   | 22.2             | 369.315 > 182.078 | 2.56                           | Control  |
| Warfarin      | Mouse   | 327              | 309.149 > 163.011 | 80.8                           | Control  |

\*Average percent remaining at last time point used to determine slope and half-life

Table S2: Microsomal Intrinsic Clearance: Data Summary

| Test Article | Test Species | NADPH-dependent CL <sub>int</sub> <sup>a</sup> (μl/min/mg) | NADPH-dependent T1/2 <sup>b</sup> (min) | NADPH-free CL <sub>int</sub> <sup>a</sup> (μl/min/mg) | NADPH-free T1/2 <sup>b</sup> (min) | Comment |
|--------------|--------------|------------------------------------------------------------|-----------------------------------------|-------------------------------------------------------|------------------------------------|---------|
| CF3CN        | Human        | < 12.8                                                     | > 180                                   | < 12.8                                                | > 180                              |         |
| Midazolam    | Human        | 511                                                        | 4.52                                    | < 12.8                                                | > 180                              | Control |
| Verapamil    | Human        | 142                                                        | 16.3                                    | < 12.8                                                | > 180                              | Control |
| CF3CN        | Mouse        | < 12.8                                                     | > 180                                   | < 12.8                                                | > 180                              |         |
| Midazolam    | Mouse        | 1099                                                       | 2.1                                     | < 12.8                                                | > 180                              | Control |
| Verapamil    | Mouse        | 247                                                        | 9.34                                    | < 12.8                                                | > 180                              | Control |

<sup>a</sup>Microsomal Intrinsic Clearance

<sup>b</sup>Half Life

Table S3: Hepatocyte Stability: Half-Life Data Summary

| Compound      | Species | Clearance (μl/min/million cells) | Half Life(min) | MRM Transition    | Avg % Remaining at Last Point* | Comments |
|---------------|---------|----------------------------------|----------------|-------------------|--------------------------------|----------|
| CF3CN         | Human   | <2.9                             | >480           | 356.01 > 153.891  | 97.2                           |          |
| 7-OH-Coumarin | Human   | 88.5                             | 15.7           | 229.061 > 152.96  | 7.17                           | Control  |
| Midazolam     | Human   | 38.8                             | 35.7           | 326.121 > 291.203 | 9.82                           | Control  |
| Verapamil     | Human   | 62.3                             | 22.3           | 455.305 > 150.075 | 2.40                           | Control  |
| CF3CN         | Mouse   | <2.9                             | >480           | 356.01 > 153.891  | 94.8                           |          |
| 7-OH-Coumarin | Mouse   | 63.2                             | 21.9           | 229.061 > 152.96  | 38.8                           | Control  |
| Midazolam     | Mouse   | 35.1                             | 39.4           | 326.121 > 291.203 | 34.0                           | Control  |
| Verapamil     | Mouse   | 31.0                             | 44.8           | 455.305 > 150.075 | 41.0                           | Control  |

\*Average percent remaining at last time point used to determine slope and half-life

Table S4: Caco-2 Permeability: Data Summary

| Test article | Test Article Concentration | Assay Duration | Mean A-B Papp 10 <sup>-6</sup> cm/s | Mean B-A Papp 10 <sup>-6</sup> cm/s | Efflux Ratio | Comments                  |
|--------------|----------------------------|----------------|-------------------------------------|-------------------------------------|--------------|---------------------------|
| CF3CN        | 10μM                       | 2 hr           | 13.0                                | 42.6                                | 3.6          |                           |
| Ranitidine   | 10μM                       | 2 hr           | 0.370                               | 5.00                                | 16.7         | Low permeability Control  |
| Talinolol    | 10μM                       | 2 hr           | 0.926                               | 9.31                                | 11.7         | P-gp Efflux Control       |
| Warfarin     | 10μM                       | 2 hr           | 39.5                                | 27.0                                | 0.7          | High permeability Control |

Table S5: BBB-PAMPA Permeability: Data Summary

| Test article | Pe   | Recovery(%) | Test Conc. |
|--------------|------|-------------|------------|
| Atenolol     | NC   | 84.6        | 10μM       |
| Verapamil    | 2.13 | 26.3        | 10μM       |
| CF3CN        | 3.09 | 89.9        | 10μM       |

## Supplementary Tables

Table S6: Turbidimetric Solubility Screen: Data Summary

| Test article | Buffer | Solubility<br>Limit( $\mu$ M)<br>2 Hour | Test Conc.              |
|--------------|--------|-----------------------------------------|-------------------------|
| Reserpine    | PBS    | 31.3                                    | Low solubility control  |
| Tamoxifen    | PBS    | 15.6                                    | Low solubility control  |
| Verapamil    | PBS    | >500                                    | High solubility control |
| CF3CN        | PBS    | >200                                    |                         |

Table S7: Human plasma protein binding: Data Summary

| Test Article | Test Species | Test Conc.<br>( $\mu$ M) | Mean Plasma<br>Fraction Unbound | Mean Plasma<br>Fraction Bound | Post-Assay<br>Recovery | Comment |
|--------------|--------------|--------------------------|---------------------------------|-------------------------------|------------------------|---------|
| CF3CN        | Human        | 5                        | 0.101%                          | 99.9%                         | 94.9%                  |         |
| Propranolol  | Human        | 5                        | 31.30%                          | 68.7%                         | 109%                   | Control |
| Warfarin     | Human        | 5                        | 0.826%                          | 99.2%                         | 91.7%                  | Control |

Table S8: Mouse plasma protein binding: Data Summary

| Test Article | Test Species | Test Conc.<br>( $\mu$ M) | Mean Plasma<br>Fraction Unbound | Mean Plasma<br>Fraction Bound | Post-Assay<br>Recovery | Comment |
|--------------|--------------|--------------------------|---------------------------------|-------------------------------|------------------------|---------|
| CF3CN        | Mouse        | 5                        | 3.55%                           | 96.4%                         | 99.8%                  |         |
| Propranolol  | Mouse        | 5                        | 11.8%                           | 88.2%                         | 91%                    | Control |
| Warfarin     | Mouse        | 5                        | 17.6%                           | 82.4%                         | 99.7%                  | Control |

Table S9: % reduction of hERG current by the indicated compound

| Compound   | IC50 ( $\mu$ M) | 0.2 $\mu$ M     | 1 $\mu$ M       | 5 $\mu$ M       | 25 $\mu$ M      |
|------------|-----------------|-----------------|-----------------|-----------------|-----------------|
| CF3CN      | >25             | 21.4            | 30.1            | 21.3            | 47.4            |
|            |                 | 12.0            | 35.9            | 38.3            | 32.3            |
|            |                 | 2.4             | 9.9             | 16.4            | 27.1            |
| X $\pm$ SD |                 | 16.3 $\pm$ 11.8 | 26.7 $\pm$ 11.5 | 21.7 $\pm$ 11.9 | 35.6 $\pm$ 10.5 |
